# Supplementary material
Source: MDPI journal article supplement (https://www.mdpi.com/2073-4352/11/11/1397)
Supplement: s1 [file s1]

# Elastic Flexibility in an Optically Active Naphthalidenimine-Based Single Crystal

Torvid Feiler <sup>1,2</sup>, Adam A. L. Michalchuk <sup>1</sup>, Vincent Schröder <sup>3,4</sup>, Emil List-Kratochvil <sup>3,4</sup>, Franziska Emmerling <sup>1,2,\*</sup> and Biswajit Bhattacharya <sup>1,\*</sup>

<sup>1</sup> BAM Federal Institute for Materials Research and Testing, Richard-Willstätter-Str. 11, 12489 Berlin, Germany; torvid.feiler@bam.de (T.F.); adam.michalchuk@bam.de (A.A.L.M.)

<sup>2</sup> Department of Chemistry, Humboldt-Universität zu Berlin, Brook-Taylor-Str. 2, 12489 Berlin, Germany

<sup>3</sup> Department of Chemistry, Department of Physics, and IRIS Adlershof, Humboldt-Universität zu Berlin, Zum Großen Windkanal 2, 12489 Berlin, Germany; vincent.schroeder@helmholtz-berlin.de (V.S.); emil.list-kratochvil@hu-berlin.de (E.L.-K.)

<sup>4</sup> Helmholtz-Zentrum Berlin für Materialien und Energie GmbH, Hahn-Meitner-Platz 1, 14109 Berlin, Germany

\* Correspondence: franziska.emmerling@bam.de (F.E.); biswajit.bhattacharya@bam.de (B.B.)

**Citation:** Feiler, T.; Michalchuk, A.A.L.; Schröder, V.; List-Kratochvil, E.J.; Emmerling, F.; Bhattacharya, B. Elastic Flexibility in an Optically Active Naphthalidenimine Based Single Crystal. *Crystals* **2021**, *11*, 1397. <https://doi.org/10.3390/cryst11111397>

## Table of Contents

Academic Editor: Ana M. Garcia-Deibe

Received: 30 October 2021

Accepted: 13 November 2021

Published: 16 November 2021

**Publisher's Note:** MDPI stays neutral with regard to jurisdictional claims in published maps and institutional affiliations.

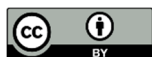

**Copyright:** © 2021 by the authors. Licensee MDPI, Basel, Switzerland. This article is an open access article distributed under the terms and conditions of the Creative Commons Attribution (CC BY) license (<https://creativecommons.org/licenses/by/4.0/>).

|                               |    |
|-------------------------------|----|
| PXRD                          | S2 |
| DSC                           | S2 |
| Face index of crystal         | S3 |
| Table related to SCXRD        | S3 |
| Energy Framework Calculations | S4 |
| Elastic Strain Calculation    | S4 |
| References                    | S4 |

## PXRD

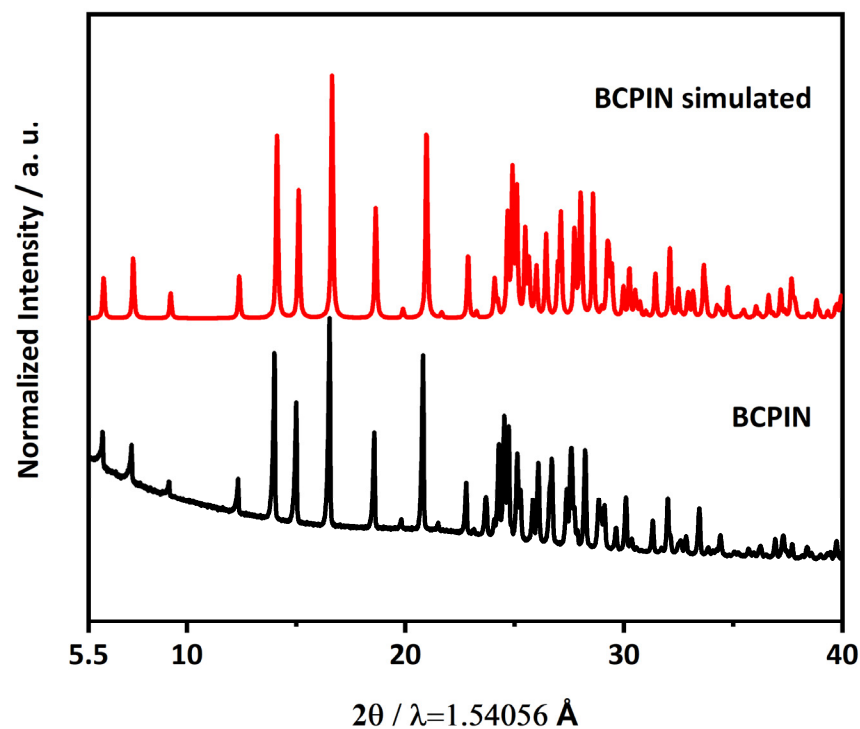

Figure S1. Experimental (black line) and simulated (red line) PXRD patterns of BCPIN.

## DSC

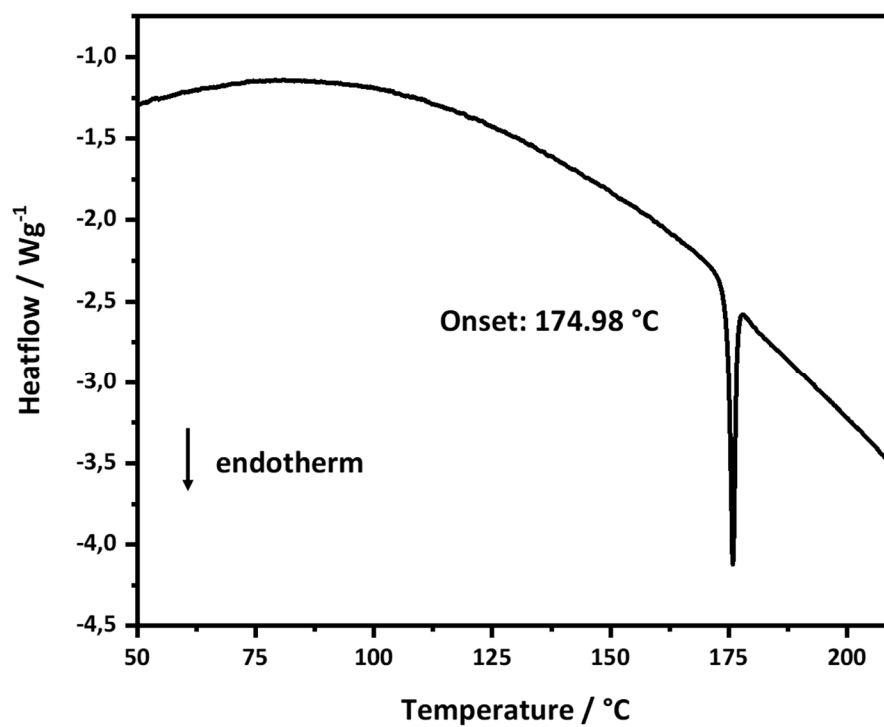

Figure S2. Differential scanning calorimetry measurement of BCPIN.

## Face index of crystal

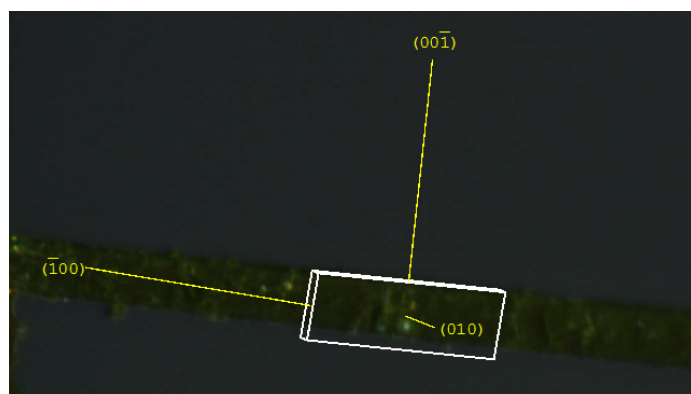

**Figure S3.** Face indexed image of pristine crystal of BCPIN.

### Table related to SCXRD

**Table S1.** Crystallographic and structural refinement parameters of BCPIN.

| Compound Name                                    | BCPIN                                  |
|--------------------------------------------------|----------------------------------------|
| Temperature/K                                    | 150                                    |
| Formula                                          | C <sub>17</sub> H <sub>11</sub> BrClNO |
| Formula Weight                                   | 360.63                                 |
| Crystal System                                   | Monoclinic                             |
| Space group                                      | <i>P</i> 2 <sub>1</sub> / <i>c</i>     |
| <i>a</i> /Å                                      | 3.8281(2)                              |
| <i>b</i> /Å                                      | 28.5346(13)                            |
| <i>c</i> /Å                                      | 12.8657(8)                             |
| $\alpha$ /°                                      | 90                                     |
| $\beta$ /°                                       | 93.554(2)                              |
| $\gamma$ /°                                      | 90                                     |
| <i>V</i> /Å <sup>3</sup>                         | 1402.66(13)                            |
| <i>Z</i>                                         | 4                                      |
| <i>D</i> <sub>c</sub> /g cm <sup>−3</sup>        | 1.708                                  |
| $\mu$ /mm <sup>−1</sup>                          | 3.118                                  |
| <i>F</i> (000)                                   | 720                                    |
| $\theta$ range/°                                 | 2.6–26.9                               |
| Reflections collected                            | 15398                                  |
| Unique reflections                               | 3006                                   |
| Reflections <i>I</i> > 2 $\sigma$ ( <i>I</i> )   | 2536                                   |
| <i>R</i> <sub>int</sub>                          | 0.052                                  |
| Goodness of fit ( <i>F</i> <sup>2</sup> )        | 1.111                                  |
| <i>R</i> 1 ( <i>I</i> > 2 $\sigma$ ( <i>I</i> )) | 0.0381                                 |
| <i>wR</i> 2( <i>I</i> > 2 $\sigma$ ( <i>I</i> )) | 0.0510                                 |
| CCDC No.                                         | 2117266                                |

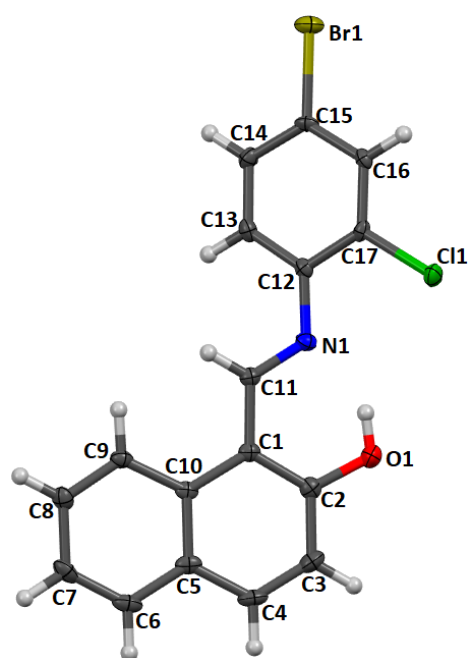

**Figure S4.** Thermal ellipsoid drawing of the asymmetric unit of BCPIN showing atom labels and 50% probability of ellipsoids.

### Energy Framework Calculations

The energy frameworks calculations relating to intermolecular interactions of BCPIN were performed using the software suite Crystal-Explorer21[1] based on B3LYP/DGDZVP molecular wavefunctions calculated using .cif files. For calculations, the hydrogen atoms were normalized to standard neutron diffraction values. The energy frameworks constructed were based on the crystal symmetry and total interaction energy components of which included electrostatic, polarization, dispersion and exchange repulsion components scaled by 1.057, 0.740, 0.871 and 0.618, respectively. The interaction energies below 5 kJ.mol<sup>-1</sup> are omitted for clarity and the cylinder thickness is proportional to the intermolecular interaction energies along the parallel vector passing through the cylinder.

A visualisation of the electrostatic, dispersion and total energy components is provided in Figure S4. The energy framework calculations indicate that the strongest interactions within the crystal lattice originate from the  $\pi \cdots \pi$  stacking along the *a*-axis (-58.8 kJ.mol<sup>-1</sup>). The chains (*c*-axis) are stabilized by a total interaction energy -53.4 kJ.mol<sup>-1</sup>. The other interactions between the chains are with -31.8 kJ.mol<sup>-1</sup> much weaker. Hence, overall intermolecular interactions in BCPIN are quasi-isotropic interactions (Table S2).

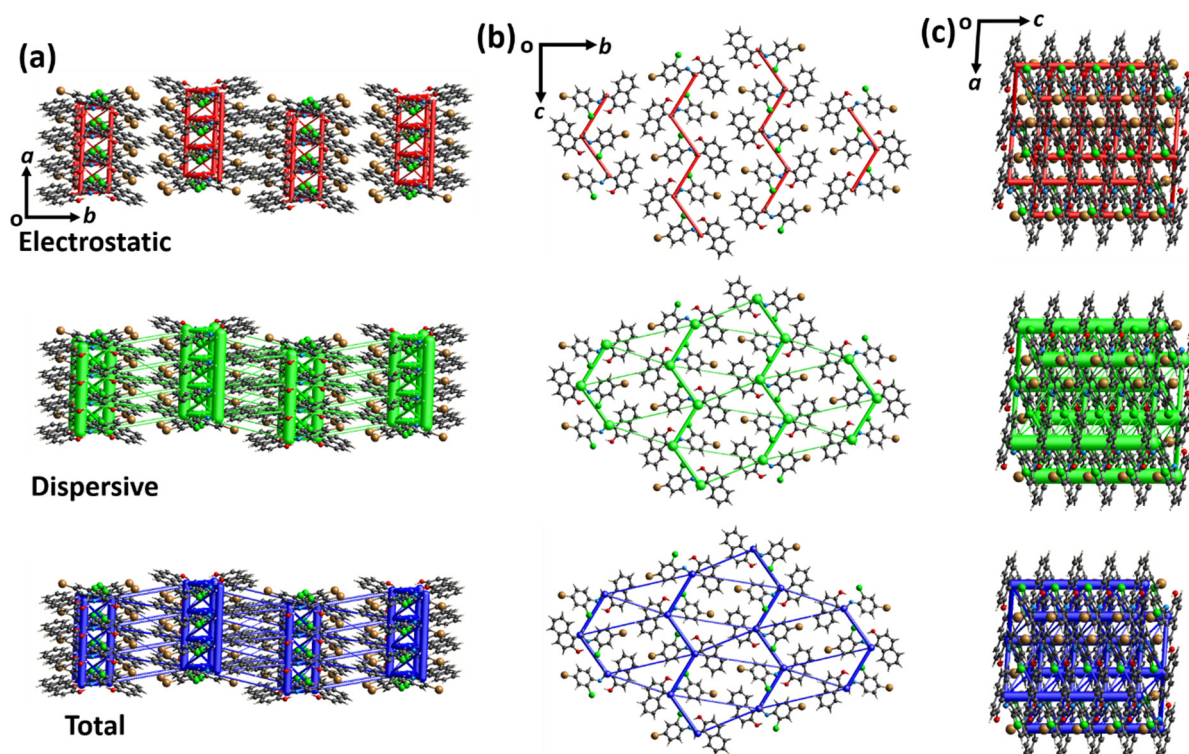

**Figure S5.** Visualization of energy frameworks showing electrostatic (red), dispersion (green) components and total interaction energy (blue) for BCPIN, in the (a) (001), (b) (100) and (c) (010) faces, respectively. The energy scale factor is 100 kJ.mol<sup>-1</sup> and the energy threshold is 10 kJ.mol<sup>-1</sup>.

**Table S2.** Molecular structure pairs and the interaction energies (kJ.mol<sup>-1</sup>) obtained from energy frameworks calculation for BCPIN. Scale factors are in the lower table.

| Interaction Energies (kJ/mol)                                                                                                                                       |                   |       |                  |       |       |       |       |       |  |
|---------------------------------------------------------------------------------------------------------------------------------------------------------------------|-------------------|-------|------------------|-------|-------|-------|-------|-------|--|
| R is the distance between molecular centroids (mean atomic position) in Å.                                                                                          |                   |       |                  |       |       |       |       |       |  |
| Total energies, only reported for two benchmarked energy models, are the sum of the four energy components, scaled appropriately (see the scale factor table below) |                   |       |                  |       |       |       |       |       |  |
| N                                                                                                                                                                   | Synop             | R     | Electron Density | E_ele | E_pol | E_dis | E_rep | E_tot |  |
| 2                                                                                                                                                                   | x, y, z           | 3.83  | B3LYP/DGDZVP     | -32.5 | -2.5  | -98.1 | 101.8 | -58.8 |  |
| 2                                                                                                                                                                   | -x, y+1/2, -z+1/2 | 14.83 | B3LYP/DGDZVP     | -3.9  | -0.2  | -8.6  | 0.0   | -11.7 |  |
| 2                                                                                                                                                                   | x, -y+1/2, z+1/2  | 6.48  | B3LYP/DGDZVP     | -22.8 | -3.1  | -33.2 | 43.3  | -28.5 |  |
| 2                                                                                                                                                                   | x, -y+1/2, z+1/2  | 7.73  | B3LYP/DGDZVP     | -2.5  | -0.7  | -7.9  | 2.4   | -8.6  |  |
| 2                                                                                                                                                                   | x, -y+1/2, z+1/2  | 7.32  | B3LYP/DGDZVP     | -9.6  | -1.3  | -20.7 | 20.6  | -16.3 |  |
| 2                                                                                                                                                                   | -x, y+1/2, -z+1/2 | 14.82 | B3LYP/DGDZVP     | 1.7   | -0.3  | -7.4  | 0.0   | -4.9  |  |
| 1                                                                                                                                                                   | -x, -y, -z        | 13.95 | B3LYP/DGDZVP     | -3.2  | -0.7  | -11.4 | 0.0   | -13.8 |  |
| 1                                                                                                                                                                   | -x, -y, -z        | 16.81 | B3LYP/DGDZVP     | 2.0   | -0.2  | -3.2  | 0.0   | -0.9  |  |
| 1                                                                                                                                                                   | -x, -y, -z        | 15.05 | B3LYP/DGDZVP     | 0.8   | -0.8  | -7.6  | 0.0   | -6.3  |  |
| 1                                                                                                                                                                   | -x, -y, -z        | 17.56 | B3LYP/DGDZVP     | -0.2  | -0.0  | -0.9  | 0.0   | -1.0  |  |

  

| Scale factors for benchmarked energy models      |       |       |        |       |
|--------------------------------------------------|-------|-------|--------|-------|
| See Mackenzie et al. IUCr3 (2017)                |       |       |        |       |
| Energy Model                                     | k_ele | k_pol | k_disp | k_rep |
| CE-HF ... HF/3-21G electron densities            | 1.019 | 0.651 | 0.901  | 0.811 |
| CE-B3LYP ... B3LYP/6-31G(d,p) electron densities | 1.057 | 0.740 | 0.871  | 0.618 |

## Elastic Strain Calculation

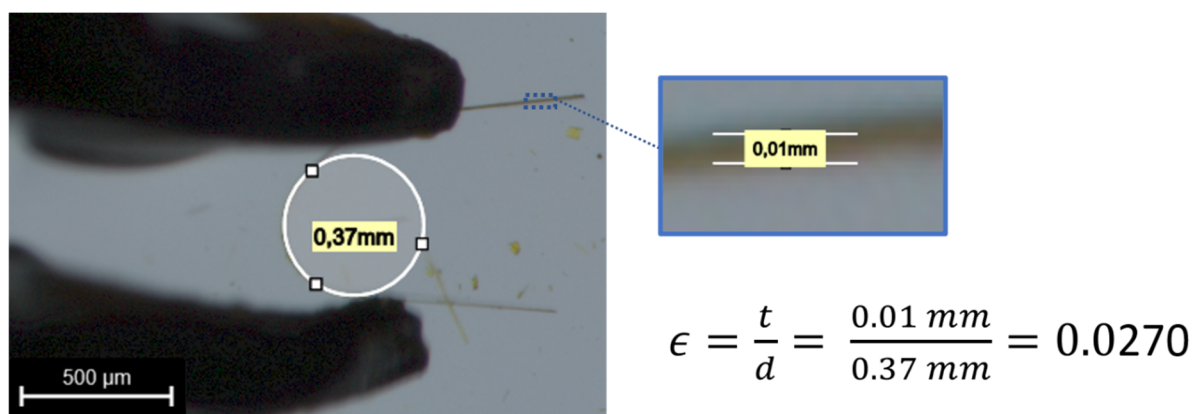

**Figure S6.** Microscopic image of bended BCPIN crystal. The elastic strain was calculated according to the Euler-Bernoulli equation  $\epsilon = \frac{t}{d}$  ( $t$ = beam thickness;  $d$ = diameter of curvature).[2] The observed elastic stress before breaking is 2.70 %.

## References

1. Spackman, P.R.; Turner, M.J.; McKinnon, J.J.; Wolff, S.K.; Grimwood, D.J.; Jayatilaka, D.; Spackman, M.A. *CrystalExplorer: A Program for Hirshfeld Surface Analysis, Visualization and Quantitative Analysis of Molecular Crystals*. *J Appl Crystallogr* **2021**, *54*, 1006–1011, doi:10.1107/S1600576721002910.
2. Yang, C.; Yoon, J.; Kim, S.H.; Hong, K.; Chung, D.S.; Heo, K.; Park, C.E.; Ree, M. Bending-Stress-Driven Phase Transitions in Pentacene Thin Films for Flexible Organic Field-Effect Transistors. *Appl. Phys. Lett.* **2008**, *92*, 243305, doi:10.1063/1.2948862.
